# Supplementary material for: Transformer Performance for Chemical Reactions: Analysis of Different Predictive and Evaluation Scenarios
Source: PubMed Central journal article supplement (PMC10091402; doi:10.1021/acs.jcim.2c01407), 2023-03-23
Supplement: ci2c01407_si_001.pdf [file ci2c01407_si_001.pdf]

# Transformer performance for chemical reactions: analysis of different predictive and evaluation scenarios

Fernando Jaume-Santero<sup>‡1,2</sup>, Alban Bornet<sup>‡1,2</sup>, Alain Valery<sup>3</sup>, Nona Naderi<sup>2,4</sup>, David Vicente Alvarez<sup>1,2</sup>, Dimitrios Proios<sup>1</sup>, Anthony Yazdani<sup>1</sup>, Colin Bournez<sup>3</sup>, Thomas Fessard<sup>3</sup>, Douglas Teodoro<sup>\*1,2,4</sup>

<sup>1</sup> Department of Radiology and Medical Informatics, University of Geneva, 1205 Geneva, Switzerland

<sup>2</sup> Geneva School of Business Administration, HES-SO University of Applied Sciences and Arts of Western Switzerland, 1227 Geneva, Switzerland

<sup>3</sup> SpiroChem AG, 4058 Basel, Switzerland

<sup>4</sup> Swiss Institute of Bioinformatics, 1015 Lausanne, Switzerland

<sup>‡</sup> Equal contribution

<sup>\*</sup> Corresponding author - douglas.teodoro@unige.ch

## S-1 – SUPPLEMENTARY INFORMATION FOR FIGURE 2 – TOP-K ACCURACY (K>=1) – USPTO-MIT

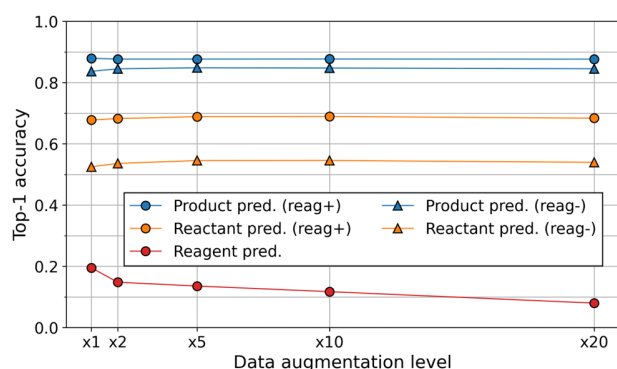

**Figure S1.** Top-1 accuracy for different data augmentation levels, using the USPTO-MIT testing dataset (same as Figure 2).

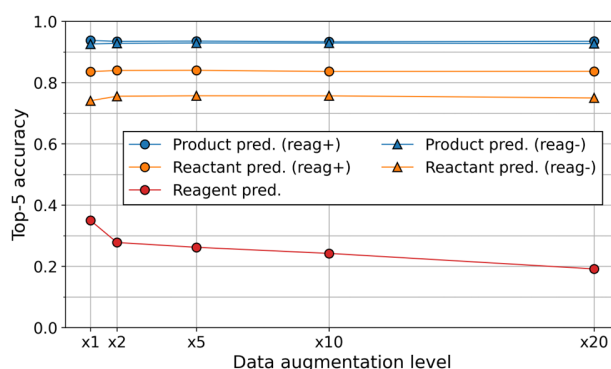

**Figure S3.** Top-5 accuracy for different data augmentation levels, using the USPTO-MIT testing dataset.

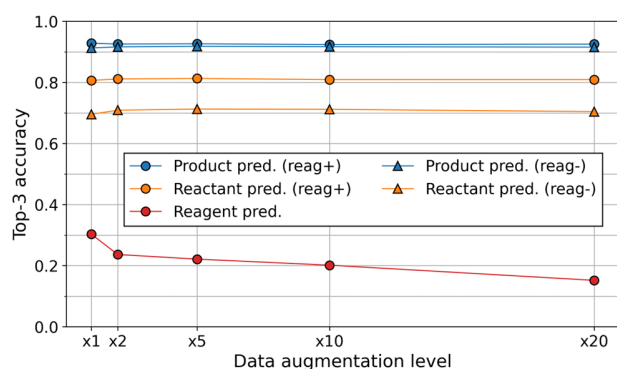

**Figure S2.** Top-3 accuracy for different data augmentation levels, using the USPTO-MIT testing dataset.

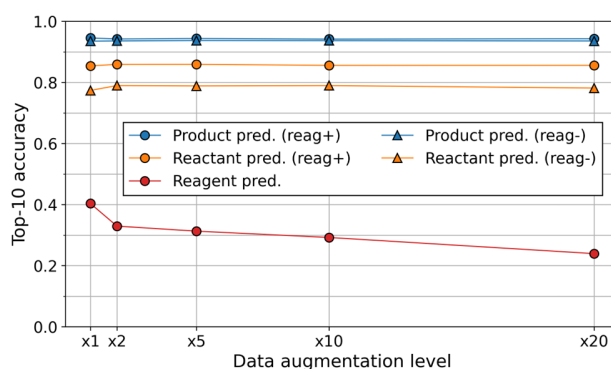

**Figure S4.** Top-10 accuracy for different data augmentation levels, using the USPTO-MIT testing dataset.

S-2 – SUPPLEMENTARY INFORMATION FOR FIGURE 2 – TOP-K ACCURACY (K>=1) – USPTO-50K

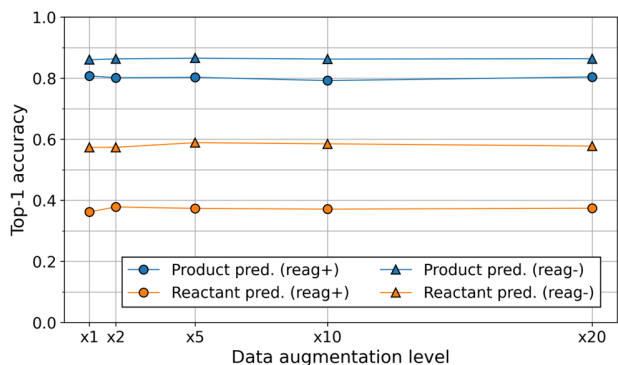

Figure S5. Top-1 accuracy for different data augmentation levels, using the USPTO-50k dataset.

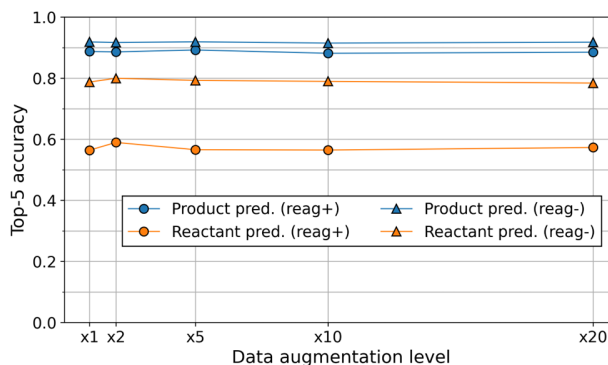

Figure S7. Top-5 accuracy for different data augmentation levels, using the USPTO-50k dataset.

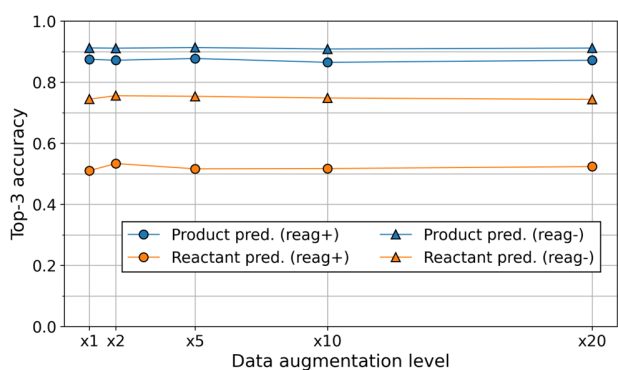

Figure S6. Top-3 accuracy for different data augmentation levels, using the USPTO-50k dataset.

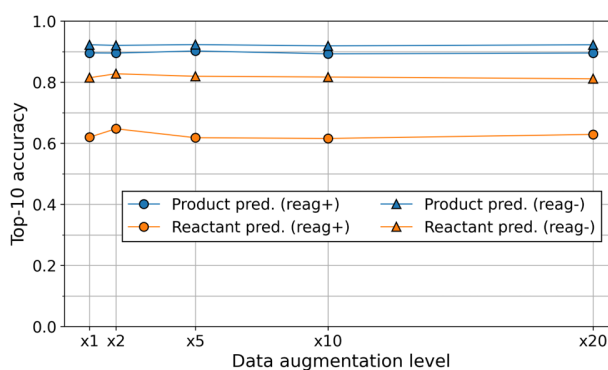

Figure S8. Top-10 accuracy for different data augmentation levels, using the USPTO-50k dataset.

### S-3 – SUPPLEMENTARY INFORMATION FOR FIGURE 3 – USPTO-MIT AND USPTO-50K

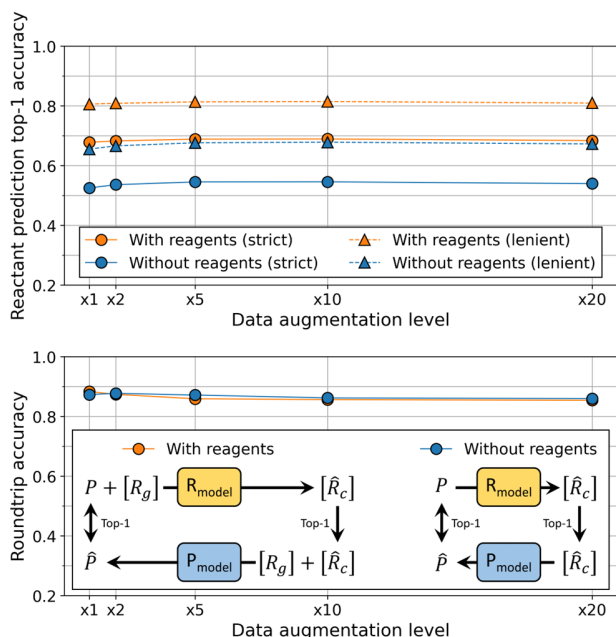

**Figure S9.** Same as Figure 3. Top-1 and round-trip accuracy for the reactant prediction task, using the USPTO-MIT testing dataset, for different levels of data augmentation. Top. Top-1 accuracy. “Strict” requires an exact match between the model prediction and the target. “Lenient” requires that at least one molecule predicted by the model matches a target molecule. Bottom. Round-trip accuracy. The diagram shows how round-trip accuracy was computed. When reagents were part of the datasets, the true reagents were added to the predicted reactants before being fed to the product prediction model.  $P$  – true product,  $[R_c]$  – true reactant(s),  $[R_g]$  – true reagent(s),  $\hat{P}$  – predicted product,  $[\hat{R}_c]$  – predicted reactant(s).

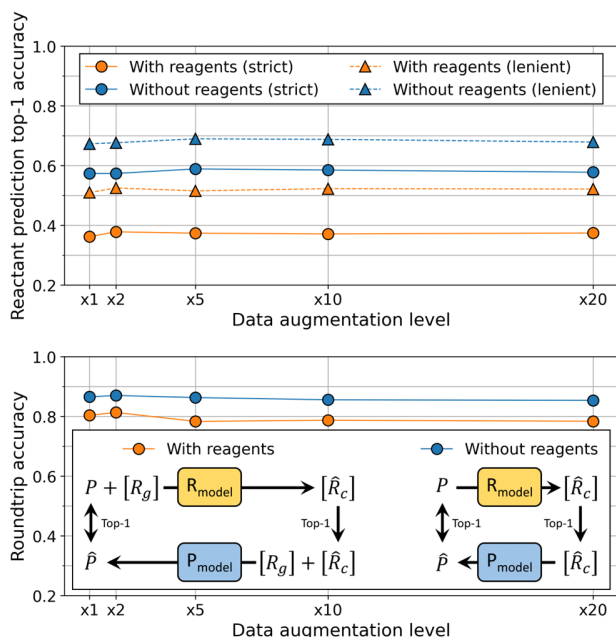

**Figure S10.** Top-1 and round-trip accuracy for the reactant prediction task, using the USPTO-50k testing dataset, for different levels of data augmentation. Top. Top-1 accuracy. “Strict” requires an exact match between the model prediction and the target. “Lenient” requires that at least one molecule predicted by the model matches a target molecule. Bottom. Round-trip accuracy. The diagram shows how round-trip accuracy was computed. When reagents were part of the datasets, the true reagents were added to the predicted reactants before they were fed to the product prediction model.  $P$  – true product,  $[R_c]$  – true reactant(s),  $[R_g]$  – true reagent(s),  $\hat{P}$  – predicted product,  $[\hat{R}_c]$  – predicted reactant(s). Note: lower performance is observed when the model was trained with reagent information, since no reagent information is included in the reactions of the USPTO-50k dataset. Still, the model reaches around 80% roundtrip accuracy.

S-4 – SUPPLEMENTARY INFORMATION FOR FIGURE 4 – DIFFERENT DATA AUGMENTATION LEVELS

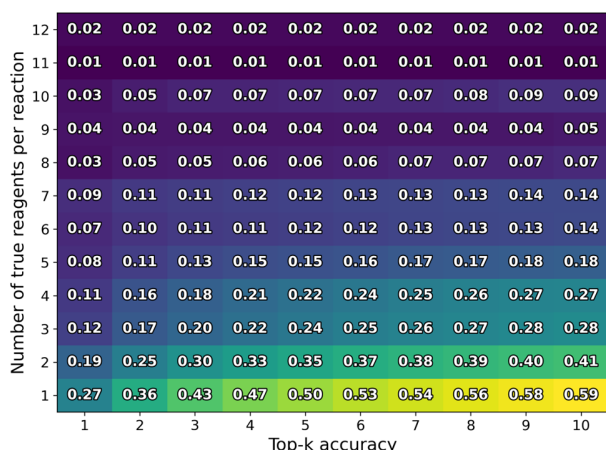

Figure S11. Top-k accuracy for reagent prediction, binning reactions of the USPTO-MIT testing dataset by the number of target reagents, after training the model with 2-fold data augmentation.

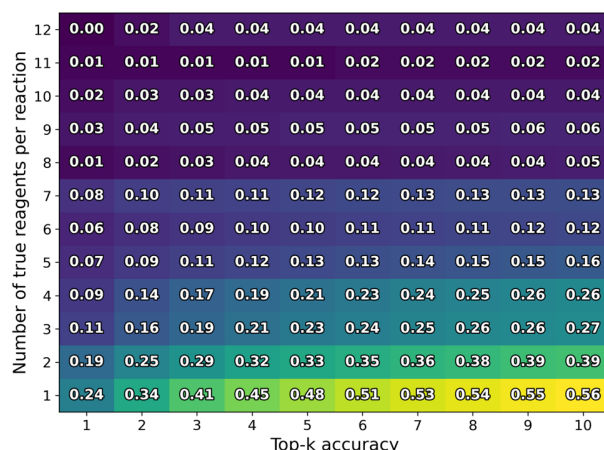

Figure S13. Top-k accuracy for reagent prediction, binning reactions of the USPTO-MIT testing dataset by the number of target reagents, after training the model with 10-fold data augmentation.

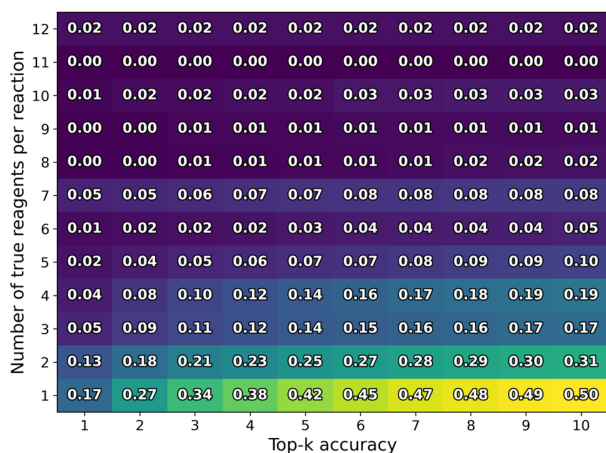

Figure S12. Top-k accuracy for reagent prediction, binning reactions of the USPTO-MIT testing dataset by the number of target reagents, after training the model with 5-fold data augmentation.

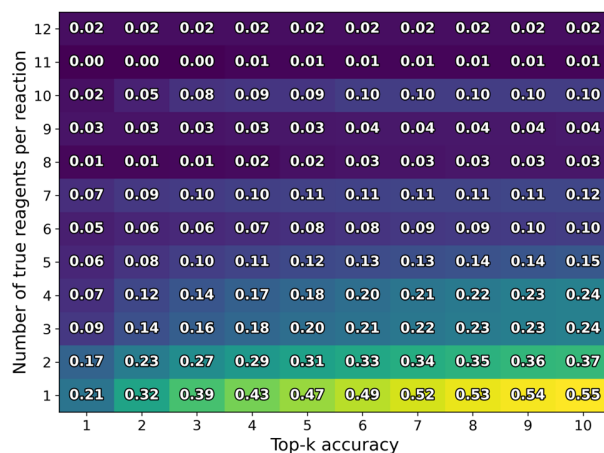

Figure S14. Top-k accuracy for reagent prediction, binning reactions of the USPTO-MIT testing dataset by the number of target reagents, after training the model with 20-fold data augmentation.

**S-5 – SUPPLEMENTARY INFORMATION FOR FIGURE 5 – DIFFERENT RANKS (K>=1)**

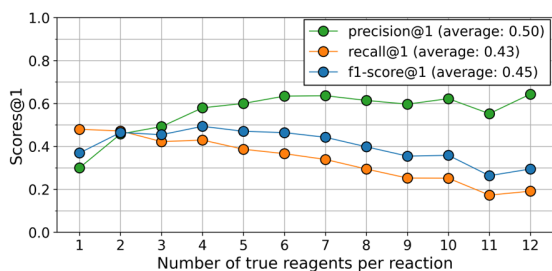

**Figure S15.** Same as Figure 5. Top. Precision, recall, and F1 scores at rank 1 for reagent predictions from the USPTO-MIT test dataset grouped by the number of target reagents.

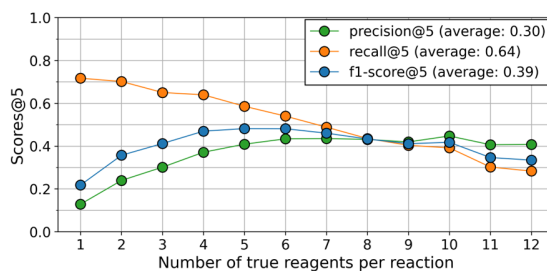

**Figure S17.** Top. Precision, recall, and F1 scores at rank 5 for reagent predictions from the USPTO-MIT test dataset grouped by the number of target reagents.

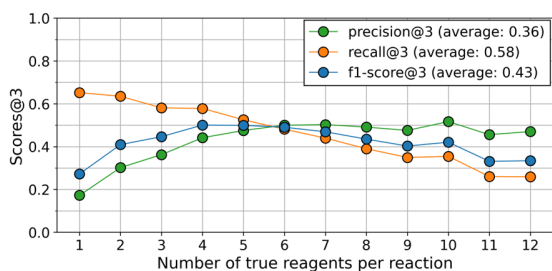

**Figure S16.** Precision, recall, and F1 scores at rank 3 for reagent predictions from the USPTO-MIT test dataset grouped by the number of target reagents.

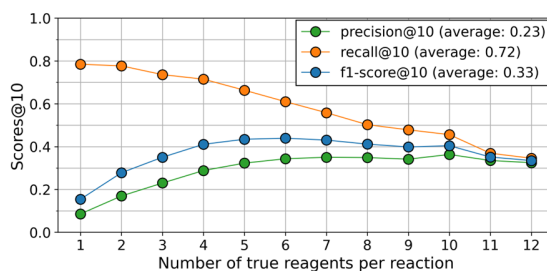

**Figure S18.** Top. Precision, recall, and F1 scores at rank 3 for reagent predictions from the USPTO-MIT test dataset grouped by the number of target reagents.

**S-6 – SUPPLEMENTARY INFORMATION FOR TABLE 1 – TOP-K ACCURACY (K=1, 3) – USPTO-MIT**

**Table S1. Same as Table 1. Top-1 accuracy using different molecule formats, tokenization schemes and embeddings strategies. Models evaluated with USPTO-MIT testing data.**

Product prediction (with reagents)

|         | Atom-level   |       | BPE   |       |
|---------|--------------|-------|-------|-------|
|         | FS           | PT    | FS    | PT    |
| SMILES  | <b>0.879</b> | 0.865 | 0.854 | 0.512 |
| SELFIES | 0.768        | 0.721 | 0.654 | 0.313 |

Product prediction (without reagents)

|         | Atom-level   |       | BPE   |       |
|---------|--------------|-------|-------|-------|
|         | FS           | PT    | FS    | PT    |
| SMILES  | <b>0.837</b> | 0.827 | 0.807 | 0.589 |
| SELFIES | 0.745        | 0.695 | 0.623 | 0.379 |

Reactant prediction (with reagents)

|         | Atom-level   |       | BPE   |       |
|---------|--------------|-------|-------|-------|
|         | FS           | PT    | FS    | PT    |
| SMILES  | <b>0.678</b> | 0.643 | 0.660 | 0.421 |
| SELFIES | 0.610        | 0.545 | 0.540 | 0.301 |

Reactant prediction (without reagent)

|         | Atom-level   |       | BPE   |       |
|---------|--------------|-------|-------|-------|
|         | FS           | PT    | FS    | PT    |
| SMILES  | <b>0.525</b> | 0.504 | 0.514 | 0.401 |
| SELFIES | 0.472        | 0.449 | 0.427 | 0.311 |

Reagent prediction

|         | Atom-level |       | BPE   |              |
|---------|------------|-------|-------|--------------|
|         | FS         | PT    | FS    | PT           |
| SMILES  | 0.196      | 0.135 | 0.183 | <b>0.211</b> |
| SELFIES | 0.187      | 0.122 | 0.174 | 0.196        |

FS – input embeddings trained from scratch, PT – pre-trained input embeddings.

**Table S2. Top-3 accuracy using different molecule formats, tokenization schemes and embeddings strategies. Models evaluated using USPTO-MIT testing datasets.**

Product prediction (with reagents)

|         | Atom-level   |       | BPE   |       |
|---------|--------------|-------|-------|-------|
|         | FS           | PT    | FS    | PT    |
| SMILES  | <b>0.928</b> | 0.918 | 0.907 | 0.620 |
| SELFIES | 0.861        | 0.825 | 0.756 | 0.405 |

Product prediction (without reagents)

|         | Atom-level   |       | BPE   |       |
|---------|--------------|-------|-------|-------|
|         | FS           | PT    | FS    | PT    |
| SMILES  | <b>0.913</b> | 0.902 | 0.885 | 0.700 |
| SELFIES | 0.848        | 0.814 | 0.733 | 0.484 |

Reactant prediction (with reagents)

|         | Atom-level   |       | BPE   |       |
|---------|--------------|-------|-------|-------|
|         | FS           | PT    | FS    | PT    |
| SMILES  | <b>0.806</b> | 0.775 | 0.774 | 0.530 |
| SELFIES | 0.739        | 0.675 | 0.655 | 0.395 |

Reactant prediction (without reagent)

|         | Atom-level   |       | BPE   |       |
|---------|--------------|-------|-------|-------|
|         | FS           | PT    | FS    | PT    |
| SMILES  | <b>0.696</b> | 0.679 | 0.663 | 0.535 |
| SELFIES | 0.631        | 0.607 | 0.561 | 0.424 |

Reagent prediction

|         | Atom-level |       | BPE   |              |
|---------|------------|-------|-------|--------------|
|         | FS         | PT    | FS    | PT           |
| SMILES  | 0.303      | 0.212 | 0.274 | <b>0.314</b> |
| SELFIES | 0.289      | 0.199 | 0.261 | 0.298        |

FS – input embeddings trained from scratch, PT – pre-trained input embeddings.

S-7 – SUPPLEMENTARY INFORMATION FOR TABLE 1 – TOP-K ACCURACY (K=5, 10) – USPTO-MIT

Table S3. Top-5 accuracy using different molecule formats, tokenization schemes and embeddings strategies. Models evaluated using USPTO-MIT testing datasets.

Product prediction (with reagents)

|         | Atom-level   |       | BPE   |       |
|---------|--------------|-------|-------|-------|
|         | FS           | PT    | FS    | PT    |
| SMILES  | <b>0.938</b> | 0.929 | 0.920 | 0.654 |
| SELFIES | 0.885        | 0.851 | 0.789 | 0.439 |

Product prediction (without reagents)

|         | Atom-level   |       | BPE   |       |
|---------|--------------|-------|-------|-------|
|         | FS           | PT    | FS    | PT    |
| SMILES  | <b>0.926</b> | 0.915 | 0.902 | 0.734 |
| SELFIES | 0.873        | 0.844 | 0.769 | 0.521 |

Reactant prediction (with reagents)

|         | Atom-level   |       | BPE   |       |
|---------|--------------|-------|-------|-------|
|         | FS           | PT    | FS    | PT    |
| SMILES  | <b>0.836</b> | 0.807 | 0.802 | 0.568 |
| SELFIES | 0.772        | 0.711 | 0.689 | 0.427 |

Reactant prediction (without reagent)

|         | Atom-level   |       | BPE   |       |
|---------|--------------|-------|-------|-------|
|         | FS           | PT    | FS    | PT    |
| SMILES  | <b>0.741</b> | 0.729 | 0.708 | 0.579 |
| SELFIES | 0.680        | 0.654 | 0.604 | 0.462 |

Reagent prediction

|         | Atom-level |       | BPE   |              |
|---------|------------|-------|-------|--------------|
|         | FS         | PT    | FS    | PT           |
| SMILES  | 0.350      | 0.248 | 0.314 | <b>0.357</b> |
| SELFIES | 0.334      | 0.234 | 0.300 | 0.341        |

FS – input embeddings trained from scratch, PT – pre-trained input embeddings.

Table S4. Top-10 accuracy using different molecule formats, tokenization schemes and embeddings strategies. Models evaluated using USPTO-MIT testing datasets.

Product prediction (with reagents)

|         | Atom-level   |       | BPE   |       |
|---------|--------------|-------|-------|-------|
|         | FS           | PT    | FS    | PT    |
| SMILES  | <b>0.945</b> | 0.938 | 0.931 | 0.688 |
| SELFIES | 0.901        | 0.874 | 0.824 | 0.474 |

Product prediction (without reagents)

|         | Atom-level   |       | BPE   |       |
|---------|--------------|-------|-------|-------|
|         | FS           | PT    | FS    | PT    |
| SMILES  | <b>0.935</b> | 0.925 | 0.917 | 0.765 |
| SELFIES | 0.892        | 0.868 | 0.805 | 0.578 |

Reactant prediction (with reagents)

|         | Atom-level   |       | BPE   |       |
|---------|--------------|-------|-------|-------|
|         | FS           | PT    | FS    | PT    |
| SMILES  | <b>0.854</b> | 0.829 | 0.828 | 0.601 |
| SELFIES | 0.800        | 0.740 | 0.722 | 0.457 |

Reactant prediction (without reagent)

|         | Atom-level   |       | BPE   |       |
|---------|--------------|-------|-------|-------|
|         | FS           | PT    | FS    | PT    |
| SMILES  | <b>0.774</b> | 0.763 | 0.750 | 0.621 |
| SELFIES | 0.717        | 0.692 | 0.645 | 0.496 |

Reagent prediction

|         | Atom-level |       | BPE   |              |
|---------|------------|-------|-------|--------------|
|         | FS         | PT    | FS    | PT           |
| SMILES  | 0.403      | 0.291 | 0.369 | <b>0.416</b> |
| SELFIES | 0.386      | 0.281 | 0.355 | 0.398        |

FS – input embeddings trained from scratch, PT – pre-trained input embeddings.

## S-8 – SUPPLEMENTARY INFORMATION FOR TABLE 1 – TOP-K ACCURACY (K=1, 3) – USPTO-50K

**Table S5. Top-1 accuracy using different molecule formats, tokenization schemes and embeddings strategies. Models evaluated using USPTO-50k. Note: The lower performance when the model was trained without reagent is explained by the absence of reagents in USPTO-50k.**

Product prediction (with reagents)

|         | Atom-level   |       | BPE   |       |
|---------|--------------|-------|-------|-------|
|         | FS           | PT    | FS    | PT    |
| SMILES  | <b>0.807</b> | 0.790 | 0.733 | 0.374 |
| SELFIES | 0.693        | 0.654 | 0.548 | 0.235 |

Product prediction (without reagents)

|         | Atom-level   |       | BPE   |       |
|---------|--------------|-------|-------|-------|
|         | FS           | PT    | FS    | PT    |
| SMILES  | <b>0.860</b> | 0.851 | 0.835 | 0.631 |
| SELFIES | 0.774        | 0.728 | 0.682 | 0.482 |

Reactant prediction (with reagents)

|         | Atom-level   |       | BPE   |       |
|---------|--------------|-------|-------|-------|
|         | FS           | PT    | FS    | PT    |
| SMILES  | <b>0.362</b> | 0.349 | 0.360 | 0.207 |
| SELFIES | 0.332        | 0.294 | 0.305 | 0.156 |

Reactant prediction (without reagent)

|         | Atom-level |       | BPE          |       |
|---------|------------|-------|--------------|-------|
|         | FS         | PT    | FS           | PT    |
| SMILES  | 0.573      | 0.549 | <b>0.592</b> | 0.484 |
| SELFIES | 0.508      | 0.489 | 0.525        | 0.401 |

FS – input embeddings trained from scratch, PT – pre-trained input embeddings.

**Table S6. Top-3 accuracy using different molecule formats, tokenization schemes and embeddings strategies. Models evaluated using USPTO-50k. Note: The lower performance when the model was trained without reagent is explained by the absence of reagents in USPTO-50k.**

Product prediction (with reagents)

|         | Atom-level   |       | BPE   |       |
|---------|--------------|-------|-------|-------|
|         | FS           | PT    | FS    | PT    |
| SMILES  | <b>0.875</b> | 0.869 | 0.812 | 0.447 |
| SELFIES | 0.802        | 0.770 | 0.641 | 0.306 |

Product prediction (without reagents)

|         | Atom-level   |       | BPE   |       |
|---------|--------------|-------|-------|-------|
|         | FS           | PT    | FS    | PT    |
| SMILES  | <b>0.912</b> | 0.904 | 0.889 | 0.700 |
| SELFIES | 0.854        | 0.830 | 0.756 | 0.623 |

Reactant prediction (with reagents)

|         | Atom-level   |       | BPE   |       |
|---------|--------------|-------|-------|-------|
|         | FS           | PT    | FS    | PT    |
| SMILES  | <b>0.510</b> | 0.482 | 0.472 | 0.285 |
| SELFIES | 0.461        | 0.409 | 0.394 | 0.216 |

Reactant prediction (without reagent)

|         | Atom-level   |       | BPE   |       |
|---------|--------------|-------|-------|-------|
|         | FS           | PT    | FS    | PT    |
| SMILES  | <b>0.745</b> | 0.731 | 0.709 | 0.594 |
| SELFIES | 0.671        | 0.648 | 0.648 | 0.626 |

FS – input embeddings trained from scratch, PT – pre-trained input embeddings.



## S-9 – SUPPLEMENTARY INFORMATION FOR TABLE 1 – TOP-K ACCURACY (K=5, 10) – USPTO-50K

**Table S7. Top-5 accuracy using different molecule formats, tokenization schemes and embeddings strategies. Models evaluated using USPTO-50k. Note: The lower performance when the model was trained without reagent is explained by the absence of reagents in USPTO-50k.**

Product prediction (with reagents)

|         | Atom-level   |       | BPE   |       |
|---------|--------------|-------|-------|-------|
|         | FS           | PT    | FS    | PT    |
| SMILES  | <b>0.887</b> | 0.884 | 0.832 | 0.473 |
| SELFIES | 0.831        | 0.803 | 0.673 | 0.331 |

Product prediction (without reagents)

|         | Atom-level   |       | BPE   |       |
|---------|--------------|-------|-------|-------|
|         | FS           | PT    | FS    | PT    |
| SMILES  | <b>0.919</b> | 0.911 | 0.901 | 0.721 |
| SELFIES | 0.872        | 0.852 | 0.782 | 0.588 |

Reactant prediction (with reagents)

|         | Atom-level   |       | BPE   |       |
|---------|--------------|-------|-------|-------|
|         | FS           | PT    | FS    | PT    |
| SMILES  | <b>0.564</b> | 0.526 | 0.512 | 0.314 |
| SELFIES | 0.506        | 0.448 | 0.426 | 0.238 |

Reactant prediction (without reagent)

|         | Atom-level   |       | BPE   |       |
|---------|--------------|-------|-------|-------|
|         | FS           | PT    | FS    | PT    |
| SMILES  | <b>0.787</b> | 0.779 | 0.746 | 0.625 |
| SELFIES | 0.715        | 0.629 | 0.626 | 0.504 |

FS – input embeddings trained from scratch, PT – pre-trained input embeddings.

**Table S8. Top-10 accuracy using different molecule formats, tokenization schemes and embeddings strategies. Models evaluated using USPTO-50k. Note: The lower performance when the model was trained without reagent is explained by the absence of reagents in USPTO-50k.**

Product prediction (with reagents)

|         | Atom-level   |       | BPE   |       |
|---------|--------------|-------|-------|-------|
|         | FS           | PT    | FS    | PT    |
| SMILES  | <b>0.896</b> | 0.894 | 0.853 | 0.502 |
| SELFIES | 0.853        | 0.826 | 0.706 | 0.356 |

Product prediction (without reagents)

|         | Atom-level   |       | BPE   |       |
|---------|--------------|-------|-------|-------|
|         | FS           | PT    | FS    | PT    |
| SMILES  | <b>0.922</b> | 0.915 | 0.911 | 0.741 |
| SELFIES | 0.886        | 0.870 | 0.809 | 0.609 |

Reactant prediction (with reagents)

|         | Atom-level   |       | BPE   |       |
|---------|--------------|-------|-------|-------|
|         | FS           | PT    | FS    | PT    |
| SMILES  | <b>0.620</b> | 0.575 | 0.557 | 0.344 |
| SELFIES | 0.557        | 0.493 | 0.460 | 0.260 |

Reactant prediction (without reagent)

|         | Atom-level   |       | BPE   |       |
|---------|--------------|-------|-------|-------|
|         | FS           | PT    | FS    | PT    |
| SMILES  | <b>0.815</b> | 0.807 | 0.780 | 0.552 |
| SELFIES | 0.750        | 0.727 | 0.685 | 0.558 |

FS – input embeddings trained from scratch, PT – pre-trained input embeddings.

## S-10 – MOLECULES WITHOUT SELFIES ENCODING

Table S9. SMILES molecules of the USPTO-MIT dataset that could not be encoded as SELFIES. Note: these molecules occurred very rarely in the reactions.

|                                                                                     |
|-------------------------------------------------------------------------------------|
| <chem>O=I(=O)Cl</chem>                                                              |
| <chem>Cl[IH2](Cl)Cl</chem>                                                          |
| <chem>O=[IH2]c1ccccc1</chem>                                                        |
| <chem>F[P-](F)(F)(F)F</chem>                                                        |
| <chem>O=C(O)c1ccccc1I(=O)=O</chem>                                                  |
| <chem>O=C1OI(=O)(O)c2ccccc21</chem>                                                 |
| <chem>S=[Re](=S)(=S)(=S)(=S)=S</chem>                                               |
| <chem>CC1(C)O[IH2](C(F)(F)F)c2ccccc21</chem>                                        |
| <chem>C12C3C4C5C1[Fe]23451678C2C1C6C7C28</chem>                                     |
| <chem>C12C3C4C5C1[Zr]23451678C2C1C6C7C28</chem>                                     |
| <chem>O=C(OI(OC(=O)C(F)(F)F)c1ccccc1)C(F)(F)F</chem>                                |
| <chem>CC(=O)OI1(OC(C)=O)(OC(C)=O)OC(=O)c2ccccc21</chem>                             |
| <chem>Cc1ccc(S(=O)(=O)N=C2CCCC[IH2]2c2ccccc2)cc1</chem>                             |
| <chem>O=C(O[IH2](OC(=O)C(F)(F)F)c1ccccc1)C(F)(F)F</chem>                            |
| <chem>C0c1cc2c(cc1OC)C([PH2](c1ccccc1)(c1ccccc1)c1ccccc1)OC2=O</chem>               |
| <chem>O=c1[nH]c2c3occc3c(F)c(F)c2n1-c1ccc([IH]S(=O)(=O)C2CC2C0Cc2ccccc2)cc1F</chem> |
